# Supplementary material for: Effect of local pH change on non-PGM catalysts – a potential-dependent mechanistic analysis of the oxygen reduction reaction
Source: Royal Society of Chemistry journal article supplement (doi:10.1039/d2cy01099b), 2022-01-01
Supplement: d2cy01099b1.pdf [file d2cy01099b1.pdf]

Supporting Information

# Effect of Local pH Change in non-PGM Catalysts – A Potential Dependent Mechanistic Analysis of the Oxygen Reduction Reaction

*J. Anjana and Azhagumuthu Muthukrishnan\**

School of Chemistry, Indian Institute of Science Education and Research  
Thiruvananthapuram, Vithura – 695551, Maruthamala P.O. Thiruvananthapuram, Kerala,  
India

Email: [muthukrishnan@iisertvm.ac.in](mailto:muthukrishnan@iisertvm.ac.in)

## Table of Contents

| S. No. | Contents                                                                                                       | Page No. |
|--------|----------------------------------------------------------------------------------------------------------------|----------|
| 1      | XPS survey spectrum of Fe/PPy-900                                                                              | 3        |
| 2      | The core-level C 1s XPS spectra Fe 2p XPS spectra                                                              | 3        |
| 3      | The Scanning electron microscopic images                                                                       | 4        |
| 4      | EELS mapping                                                                                                   | 5        |
| 5      | The powder X-ray diffraction of Fe/PPy and Fe/PPy-900                                                          | 6        |
| 6      | The Raman spectra                                                                                              | 7        |
| 7      | BET adsorption isotherm and PSD                                                                                | 8        |
| 8      | The number of electrons ( $n$ ) transferred and percentage of H <sub>2</sub> O <sub>2</sub>                    | 8        |
| 9      | The RRDE voltammograms of the ORR at (a) pH <sub>b</sub> <sup>4</sup> and (b) pH <sub>b</sub> <sup>3,5</sup> . | 9        |
| 10     | Local pH change with applied potential                                                                         | 10       |
| 11     | Mapping of the local pH change during ORR                                                                      | 11       |
| 12     | RDE voltammograms of ORR and H <sub>2</sub> O <sub>2</sub> reduction reactions                                 | 12       |
| 13     | The current density of H <sub>2</sub> O <sub>2</sub> reduction reaction at 0.2 V                               | 13       |
| 14     | Scheme for the ORR mechanism                                                                                   | 14       |
| 15     | Estimation of number of electrons                                                                              | 14       |
| 16     | Estimation of local pH on the disk electrode                                                                   | 15       |
| 17     | Table of atomic weight percentages of the elements (from XPS)                                                  | 16       |
| 18     | Table of nitrogen content (from XPS)                                                                           | 16       |
| 19     | Table of onset potentials from RRDE voltammograms                                                              | 16       |
| 20     | Table of Tafel slopes                                                                                          | 17       |

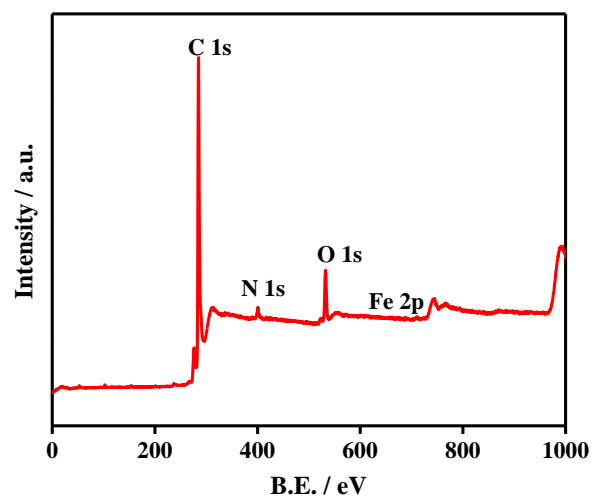

**Figure S1.** XPS survey spectrum of Fe/PPy-900

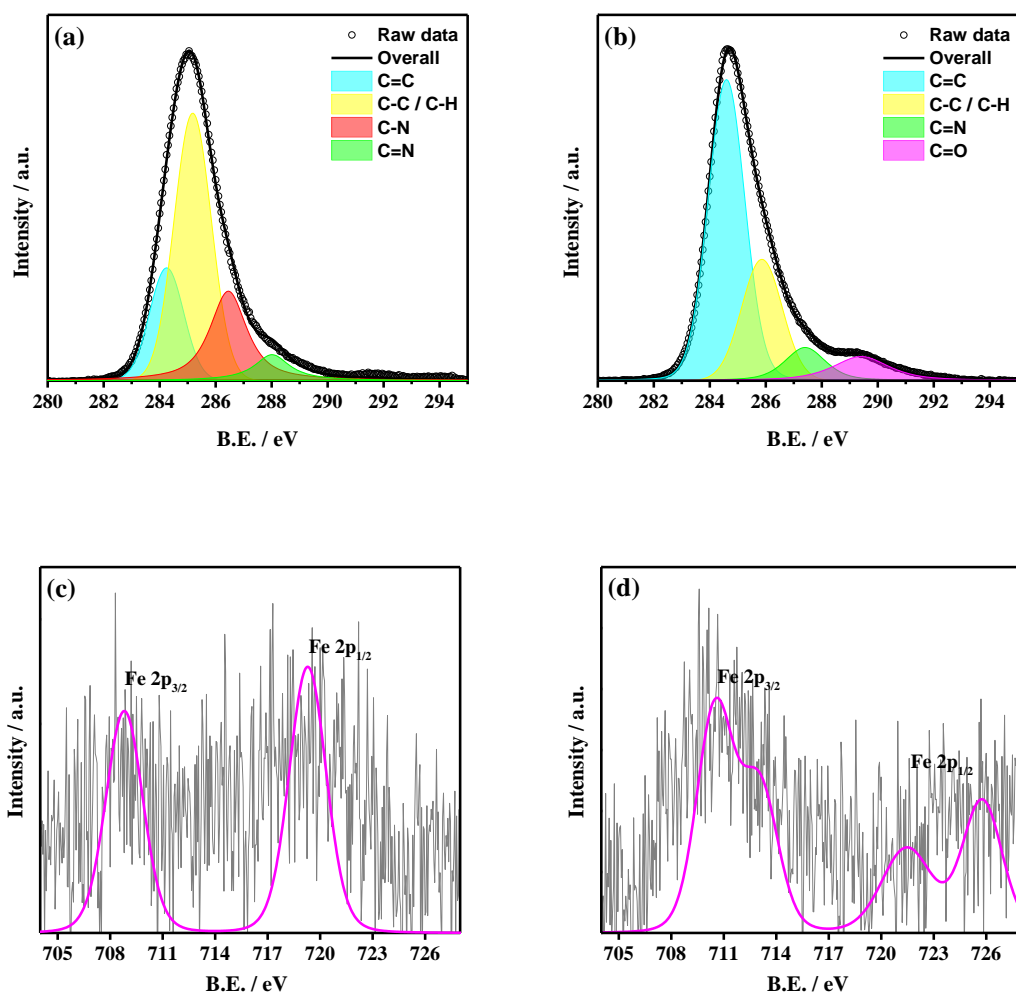

**Figure S2.** The core-level C 1s XPS spectra (a, b) and Fe 2p XPS spectra (c, d) of Fe/PPy (a, c) and Fe/PPy-900 (b, d)

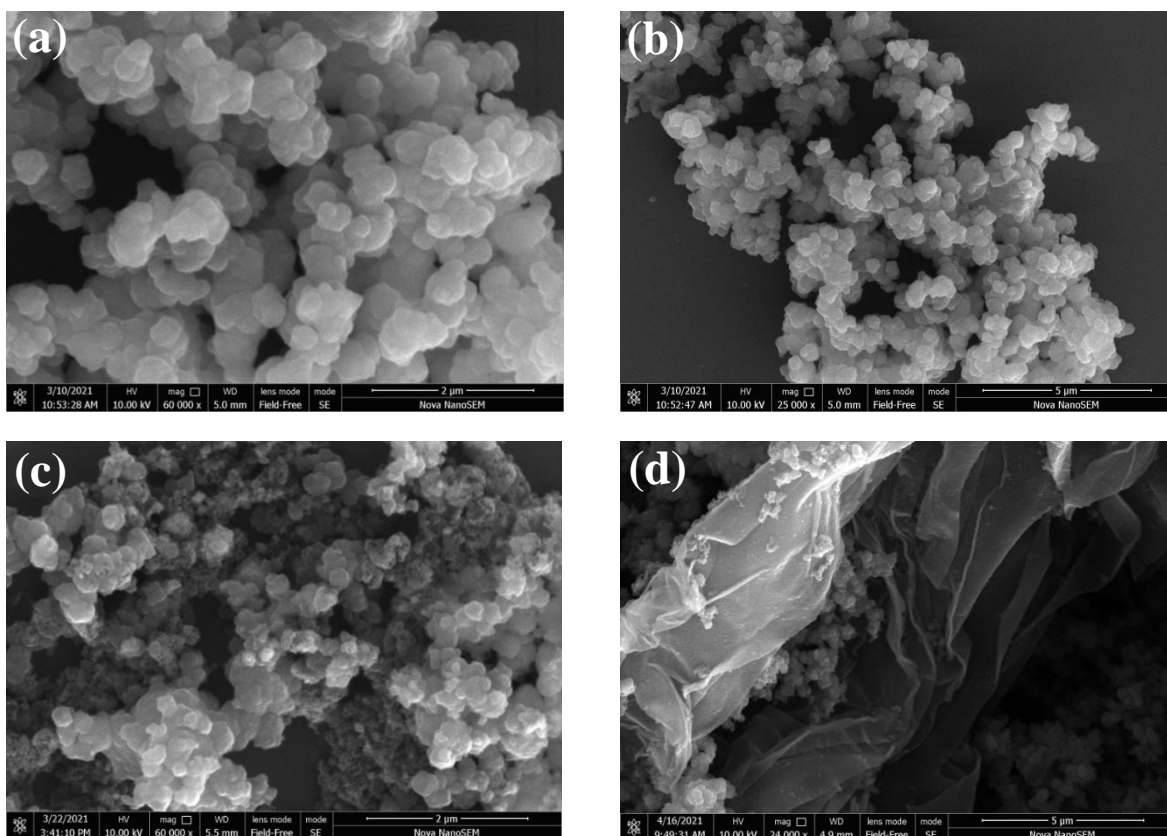

**Figure S3.** The Scanning electron microscopic images of Fe/PPy (a, b) and Fe/PPy-900 (c, d)

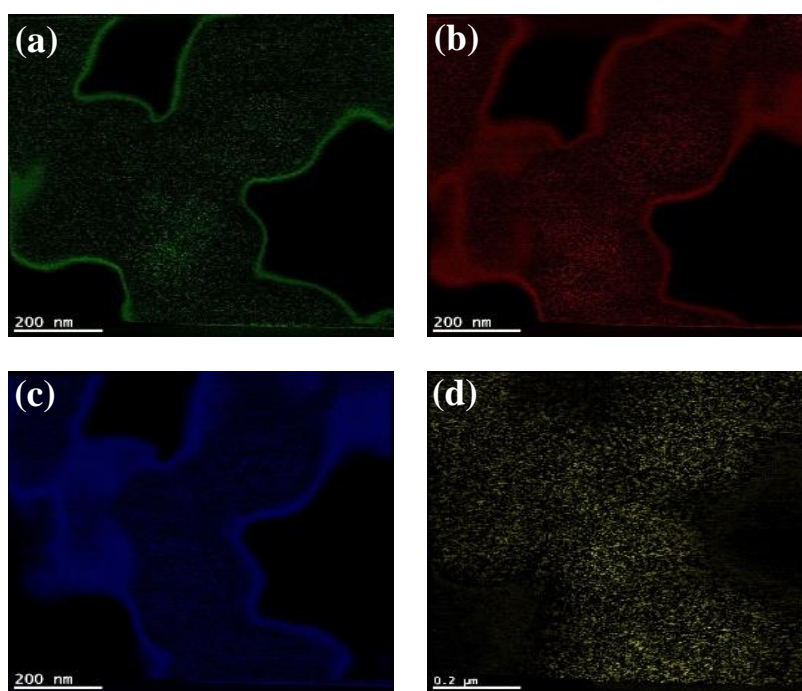

**Figure S4.** The EELS elemental mapping of Fe/PPy-900 for the elements (a) carbon, (b) nitrogen, (c) oxygen and (d) iron.

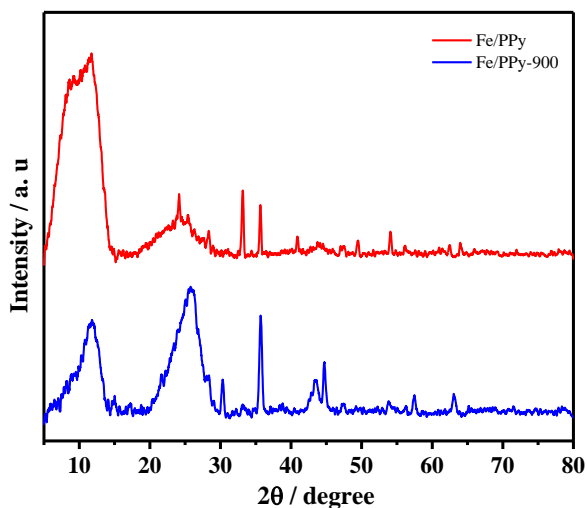

**Figure S5.** The powder X-ray diffraction patterns of Fe/PPy and Fe/PPy-900

The X-ray diffraction (XRD) experiments were carried out to characterize the crystalline nature of the compounds. Fe/PPy-900 shows crystalline peaks which corresponds to Fe species present in the catalyst with the typical graphitic carbon peaks at  $2\theta = 11.8$  (001), 25.6 (002) and 43.8 (100). The high intense peak at 11.8 indicates the presence of oxygen functionalities. More crystalline peaks appear at 30.3 (corresponds to  $\text{Fe}_2\text{O}_3$ ), 35.8 ( $\text{Fe}_3\text{O}_4$ ), 43.2 ( $\text{Fe}_2\text{O}_3$  or Fe nitrides), 44.7 (Fe nanoparticles or Fe nitrides), and less intense peaks at 53.9, 57.4 and 63.1 which corresponds to the Fe oxides.

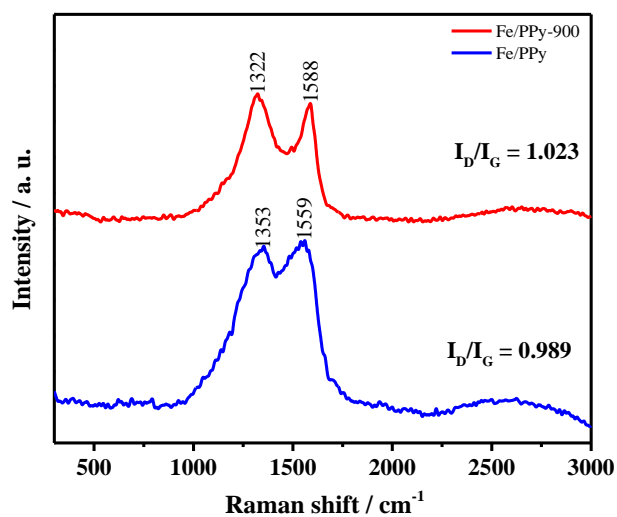

**Figure S6.** The Raman spectra of Fe-polypyrrole composite before (Fe/PPy) and after heat-treatment (Fe/PPy-900)

The Fe/PPy shows the characteristic peaks at 1353 and 1559 cm<sup>-1</sup> corresponds to ring stretching and C=C backbone stretching mode of PPy. In the heated compound, the peaks are obtained at 1322 (D band) and 1588 cm<sup>-1</sup> (G band). The  $I_D/I_G$  ratio improves from 0.98 to 1.02 after the heat treatment, which indicates that there are defects introduced in the system.

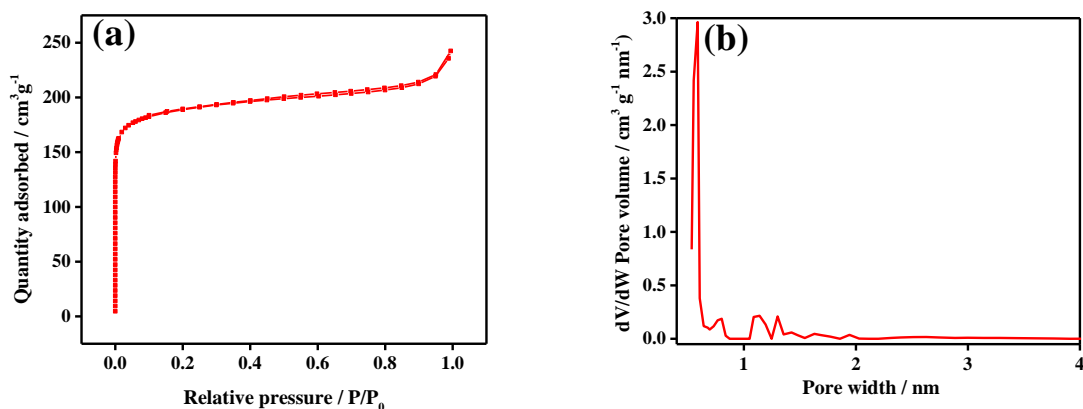

**Figure S7.** (a) BET adsorption isotherm and (b) NL-DFT pore size distribution of Fe/PPy-900

BET adsorption studies reveals that the Fe/PPy-900 contains almost only micropores and very less number of mesopores. Also, it has a high surface area of  $672.33 \text{ m}^2/\text{g}$  and the pore size analysis shows that it mostly contains pores of size ranging from 0.5-1.4 nm.

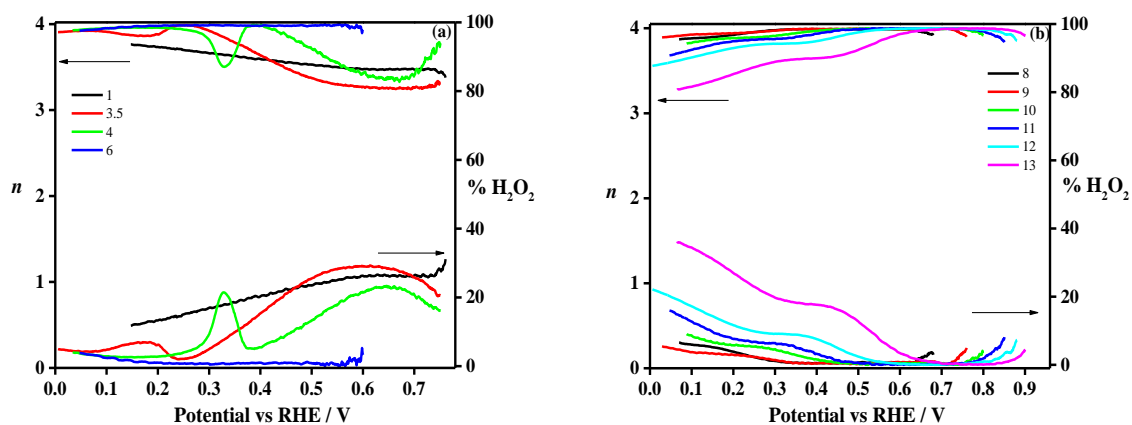

**Figure S8.** The number of electrons ( $n$ ) transferred and percentage of  $\text{H}_2\text{O}_2$  produced during ORR at (a) acidic and (b) alkaline electrolytes



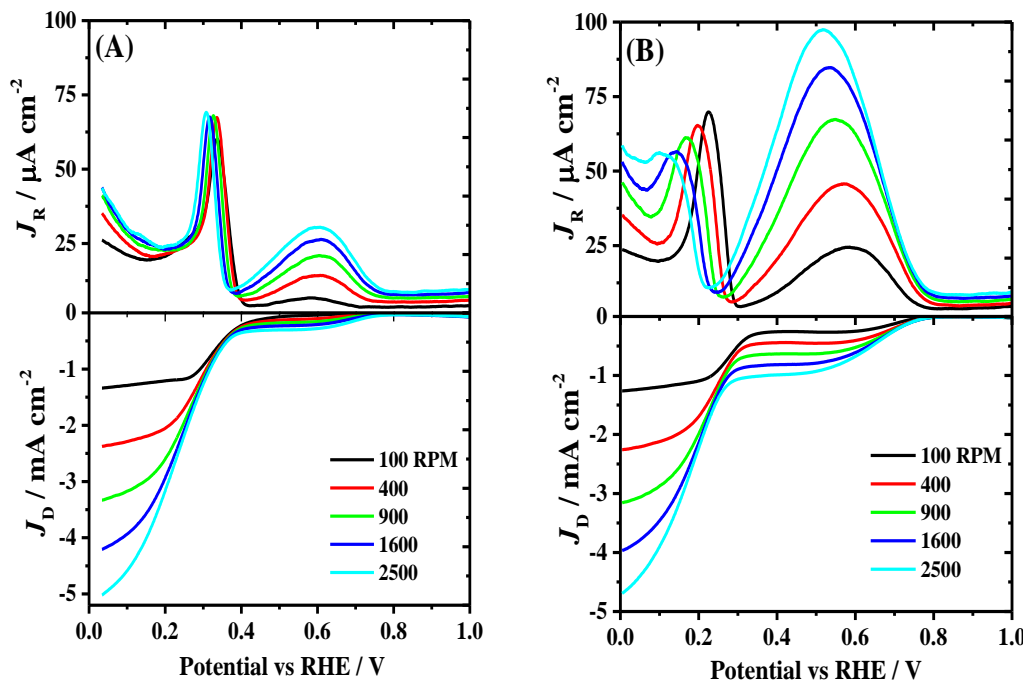

**Figure S9.** The RRDE voltammograms of the ORR on Fe/PPy-900 coated GC electrode in 0.1 M  $\text{KClO}_4 + \text{HClO}_4$  (used to adjust the pH of the electrolyte) at (a)  $\text{pH}_b^4$  and (b)  $\text{pH}_b^{3.5}$ . The scan rate is  $0.01 \text{Vs}^{-1}$ .

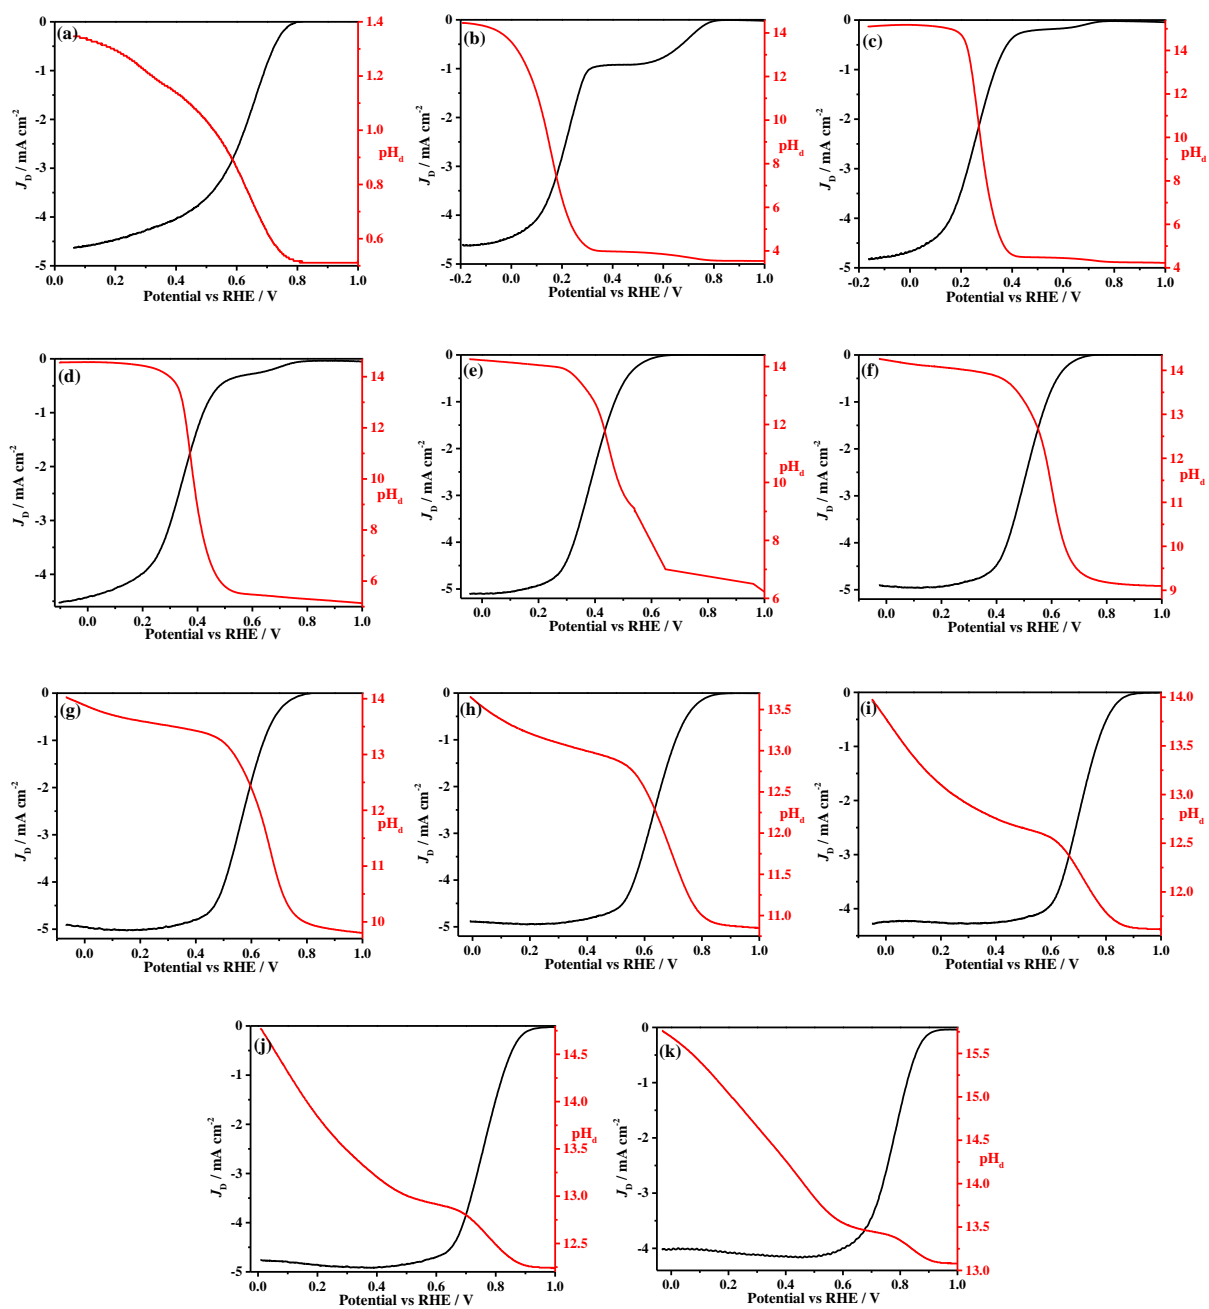

**Figure S10:** Local pH change with applied potential at various bulk pH electrolytes (a)  $\text{pH}_b^1$ , (b)  $\text{pH}_b^{3.5}$ , (c)  $\text{pH}_b^4$ , (d)  $\text{pH}_b^5$ , (e)  $\text{pH}_b^6$ , (f)  $\text{pH}_b^8$ , (g)  $\text{pH}_b^9$  (h)  $\text{pH}_b^{10}$ , (i)  $\text{pH}_b^{11}$ , (j)  $\text{pH}_b^{12}$  and (k)  $\text{pH}_b^{13}$

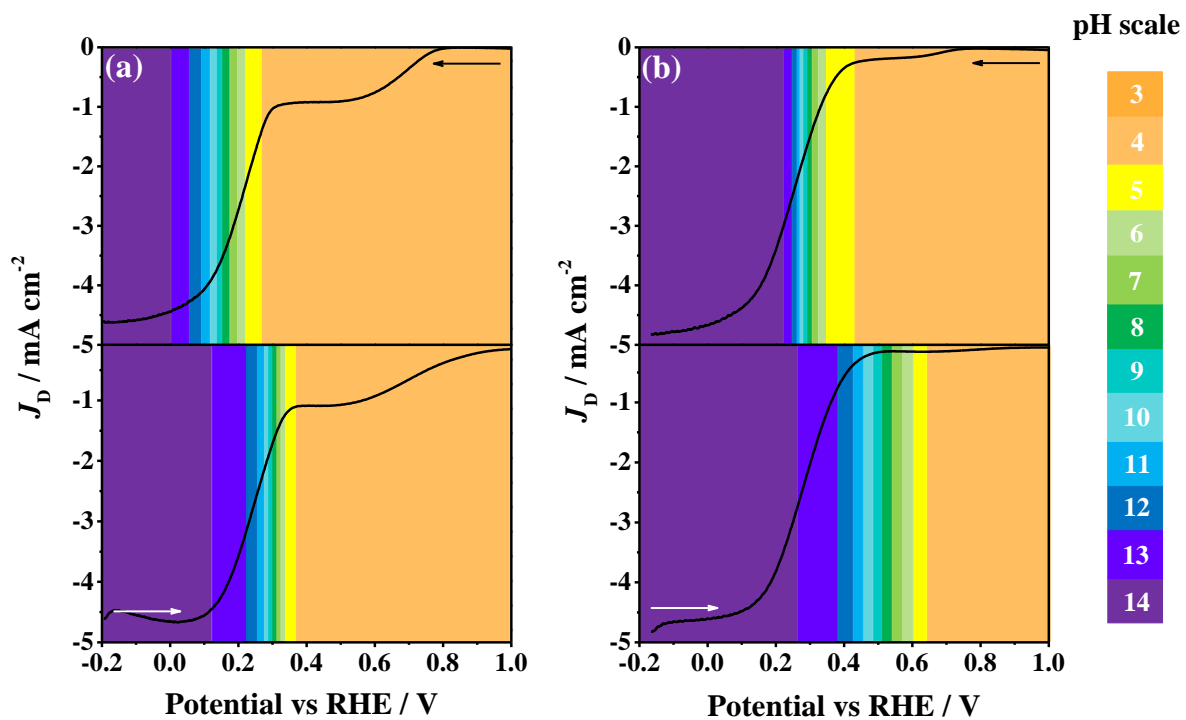

**Figure S11.** Mapping of the local pH change during ORR (forward and backward scans) with potential at pH (a)  $\text{pH}_b^4$  and (b)  $\text{pH}_b^{3.5}$ .

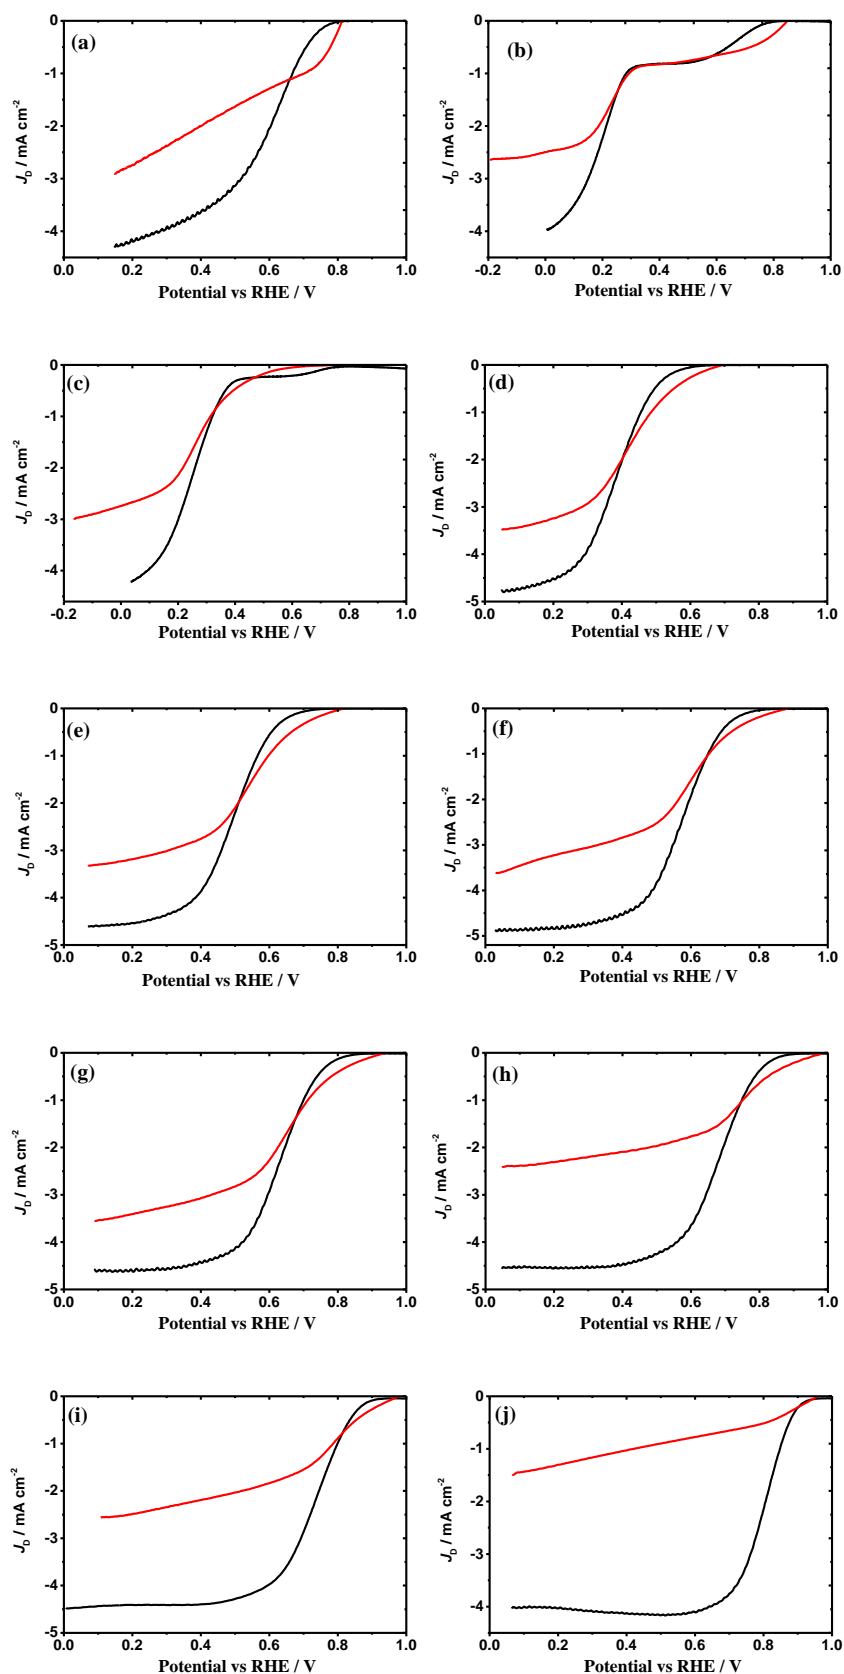

**Figure S12:** Comparison of RDE voltammograms of ORR (black) and  $\text{H}_2\text{O}_2$  reduction reactions (red) with varying pH of the electrolytes (a)  $\text{pH}_b^1$ , (b)  $\text{pH}_b^{3.5}$ , (c)  $\text{pH}_b^4$ , (d)  $\text{pH}_b^6$ , (e)  $\text{pH}_b^8$ , (f)  $\text{pH}_b^9$ , (g)  $\text{pH}_b^{10}$ , (h)  $\text{pH}_b^{11}$ , (i)  $\text{pH}_b^{12}$  and (j)  $\text{pH}_b^{13}$

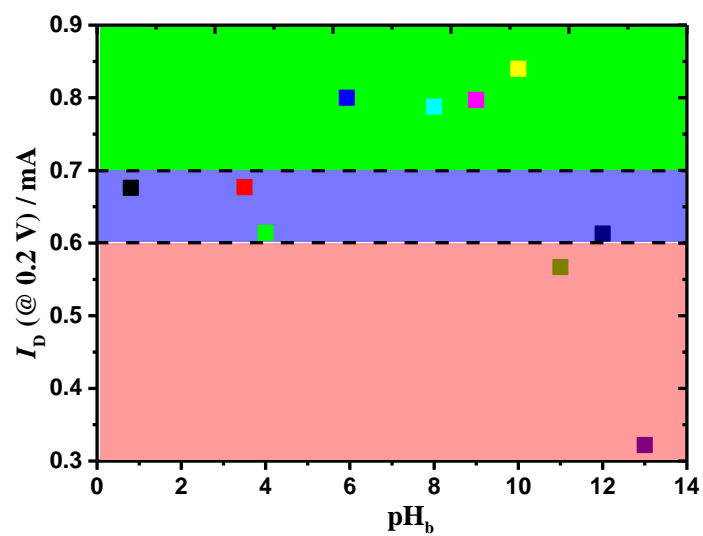

**Figure S13.** The current density of  $\text{H}_2\text{O}_2$  reduction reaction at 0.2 V vs RHE (except the pH 3.5 and 4 electrolytes, taken at 0 V vs RHE).

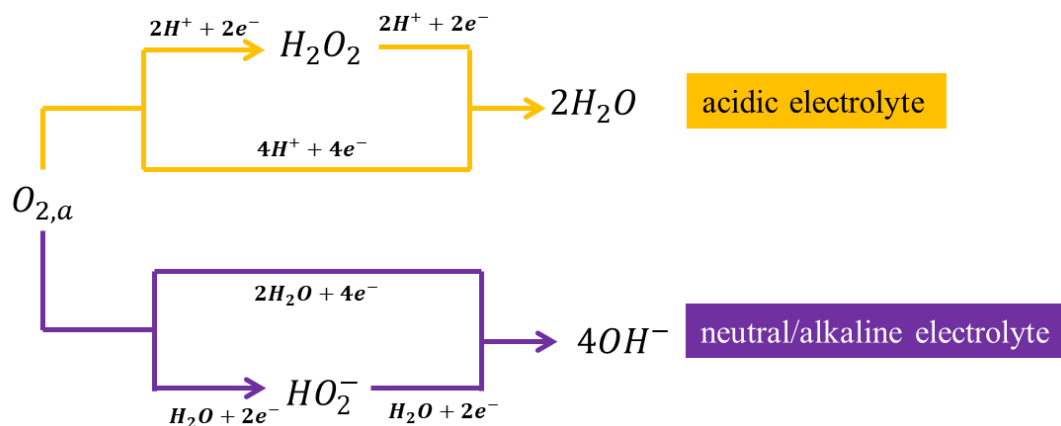

**Scheme S1.** The scheme for the ORR mechanism acidic and neutral/alkaline electrolytes

### Estimation of number of electrons

Number of electrons ( $n$ ) and percentage  $H_2O_2$  produced are calculated by the equations

$$n = \frac{4I_D}{I_D + I_R/N}$$

$$\% H_2O_2 = 100 \frac{2I_R/N}{I_D + I_R/N}$$

Where  $I_D$  is the faradaic current at the disk,  $I_R$  is the faradaic current at the ring and  $N$  is the collection efficiency at the ring, taken as 0.3

## Estimation of local pH on the disk electrode

The calibration plot demonstrates the linear relationships of  $OCP_r$  with pH in the acidic and alkaline regions. From this relation, one can estimate the local pH of the ring electrode.

$$OCP_r = m \text{pH}_r + C$$

Where  $m$  and  $C$  represents the slope and intercept

$$\text{pH}_r = \frac{OCP_r - C}{m} \quad (S1)$$

Since the  $OH^-$  ions are generated due to the ORR at neutral medium which is responsible for the local pH change, the  $OH^-$  ion concentration is taken in to account. Subsequently, the pOH will be used in this calculations,

$$\text{pOH}_r = -\log[OH^-]_r$$

Since the  $[OH^-]_d = \frac{[OH^-]_r}{N}$

$$\text{pOH}_r = -\log(N[OH^-]_d)$$

$$\text{pOH}_r = -\log(0.37) - \log[OH^-]_d$$

$$\text{pOH}_r = \text{pOH}_d - \log(0.37)$$

converting into the pH scale,

$$14 - \text{pOH}_r = 14 - [\text{pOH}_d - \log(0.37)]$$

$$\text{pH}_r = \text{pH}_d + \log(0.37)$$

Hence the local pH on the disk electrode can be calculated from the local pH of the ring electrode using the following relation. The  $\text{pH}_r$  is calculated from the OCP as shown in the equation (1).

$$\text{pH}_d = \text{pH}_r + 0.432 \quad (\text{S2})$$

**Table S1.** Atomic percentage of the elements obtained from XPS data

|            | % C   | %N    | %O   | %Fe |
|------------|-------|-------|------|-----|
| Fe/PPy     | 83.03 | 11.23 | 5.24 | <1  |
| Fe/PPy-900 | 92.13 | 1.88  | 5.23 | <1  |

**Table S2.** Percentage of different types of nitrogen obtained from XPS data

|            | Py-N  | Im-N | -N-H+ | Pr-N  | Gr-N  | Fe-N  | N-O   |
|------------|-------|------|-------|-------|-------|-------|-------|
| Fe/PPy     | -     | 1.76 | 9.37  | 88.87 | -     | -     | -     |
| Fe/PPy-900 | 14.85 | -    | -     | -     | 56.63 | 12.95 | 15.57 |

Py-N – Pyridinic, Im – imine, Pr – pyrrolic, Gr – graphitic, N-O – nitrogen oxides

**Table S3.** The RRDE voltammograms onset potentials of the ORR at different electrolytic pH values.

| pH of electrolyte | $E_{onset}^{O_2}$ |
|-------------------|-------------------|
| 1                 | 0.80              |
| 3.5               | 0.79              |
| 4                 | 0.76              |
| 6                 | 0.66              |
| 8                 | 0.75              |
| 9                 | 0.79              |
| 10                | 0.84              |
| 11                | 0.91              |
| 12                | 0.94              |
| 13                | 0.98              |



**Table S4.** Tafel slopes calculated from the plot shown in Figure 6.

| pH of the electrolyte | Tafel slope<br>mV dec <sup>-1</sup> |
|-----------------------|-------------------------------------|
| 1                     | -57                                 |
| 3.5                   | -69                                 |
| 4                     | -151                                |
| 6                     | -94                                 |
| 8                     | -96                                 |
| 9                     | -92                                 |
| 10                    | -92                                 |
| 11                    | -88                                 |
| 12                    | -85                                 |
| 13                    | -69                                 |
